# Supplementary material
Source: publisher figshare collection journal article supplement (https://sage.figshare.com/ndownloader/files/45129689)
Supplement: Supplementary file 1 [file 45129689]

## Sheet: Compliance
	Requirement status for Continuity of Care	REQUIRED	REQUIRED	OPTIONAL		OPTIONAL	REQUIRED	CONDITIONAL	REQUIRED	REQUIRED	REQUIRED	OPTIONAL	OPTIONAL	REQUIRED	REQUIRED	OPTIONAL	OPTIONAL	OPTIONAL	OPTIONAL
	Requirement status for Proof of Vaccination	REQUIRED	REQUIRED	OPTIONAL		NOT NEEDED	REQUIRED	CONDITIONAL	REQUIRED	REQUIRED	REQUIRED	OPTIONAL	OPTIONAL	REQUIRED	OPTIONAL	CONDITIONAL	OPTIONAL	OPTIONAL	NOT NEEDED
#	Data element	NAME	DATE OF BIRTH	UNIQUE IDENTIFIER		VACCINE OR PROPHYLAXIS	VACCINE BRAND	VACCINE MANUFACTURER	VACCINE BATCH NUMBER	DATE OF VACCINATION	DOSE NUMBER	VACCINATION VALID FORM	TOTAL DOSES	COUNTRY OF VACCINATION	ADMINISTERING CENTER	SIGNATURE OF HEALTH WORKER	HEALTH WORKER IDENTIFIER	DISEASE OR AGENT TARGETED	DUE DATE OF NEXT DOSE	Source	Link	Date	Date Accessed
1	NYS Wallet	Y	Y	N		N	Y	Y	Y	Y	Y	N	Y	N	Y	N	N	N	N	Documentation	https://covid19vaccine.health.ny.gov/system/files/documents/2022/10/excelsior_pass_wallet_app_android_english_guide.pdf	N/A	2022-12-02
2	ALHOSN	Y	Y	Y		N	Y	Y	Y	Y	Y	N	N	N	Y	N	N	N	N	Product site	https://alhosnapp.ae/en/using-alhosn/	N/A	2022-12-02
3	AarogyaSetu	Y	N	Y		N	Y	Y	N	Y	Y	N	Y	N	N	N	N	N	Y	Documentation	https://www.aarogyasetu.gov.in/wp-content/uploads/2021/06/mygov-999999999903278292.pdf	2021-06-01	2022-12-02
4	401Health	Y	Y	N		N	Y	Y	Y	Y	Y	N	N	N	Y	N	N	N	N	Product site and documentation	https://covid.ri.gov/covid-19-prevention/401health-app AND https://spec.smarthealth.cards/examples/	N/A	2022-12-06
5	ArriveCAN	Y	Y	N		N	Y	Y	N	Y	Y	N	N	Y	N	N	N	N	N	Product site	https://arrivein.com/immigration/how-to-use-arrivecan-to-enter-canada/	2022	2022-12-06
6	CANImmunize	Y	Y	N		N	Y	Y	Y	Y	Y	N	Y	N	Y	Y	N	N	N	Product site	https://www.canimmunize.ca/en/how-to-enter-your-vaccinations-with-canimmunize	2022	2022-12-06
7	CLEAR - Fast, Touchless Access	no information
8	Coronapas	Y	Y	Y		Y	Y	Y	N	Y	Y	N	N	N	N	N	N	N	N	News outlet	https://www.ft.com/content/332d9774-da3d-4b25-95e8-df5267dc2d48		2022-12-06
9	COVID Certificate	Y	Y	Y		N	Y	N	Y	Y	Y	N	Y	Y	N	Y	N	N	N	Product site	https://covidcertificate-form.admin.ch/foreign		2022-12-06
10	COVIDCert NI	eu certificate
11	DHA - هيئة الصحة بدبي	Y	Y	Y		N	Y	Y	Y	Y	Y	N	N	N	Y	N	N	N	N	Same as ALHOSN			2022-12-06
12	e-Tabib	Y	Y	Y		N	Y	Y	Y	Y	Y	N	N	N	N	N	N	Y	N	Government site	https://www.digital.gov.az/en/media/press/covid-19-certificates-are-already-in-mygov AND https://www.digital.gov.az/en/media/press/those-vaccinated-with-the-first-dose-will-be-able-to-enter-indoors	2021	2022-12-06
13	EarthMed GO	Y	Y	N		N	Y	Y	N	Y	Y	N	N	N	N	N	N	N	N	Product store site	https://apps.apple.com/us/app/earthmed-go/id1593801097 and https://www.google.com/url?sa=i&url=https%3A%2F%2Fbkkservicehub.escap.un.org%2Fdocuments%2FCOVIDVaxGuide%2Fdownload&psig=AOvVaw1IPq0BGsmivs5eGykuS2Nx&ust=1670516380949000&source=images&cd=vfe&ved=2ahUKEwih9YvN9Of7AhWGqY4IHYXQCeYQr4kDegQIARAy	N/A	2022-12-06
14	Egypt Health Passport اطمئن	not free																					2022-12-06
15	GHA COVID Pass Gibraltar	Y	Y	Y		N	Y	Y	Y	Y	Y	N	Y	Y	N	N	N	Y	N	Product store site	https://play.google.com/store/apps/details?id=com.gha.gibraltarvaccineapp&hl=en_US&gl=US and https://www.gibraltar.gov.gi/mygha-privacy-policy	2022-04-27	2022-12-06
16	HMH Well	Y	Y	Y		N	Y	Y	Y	Y	Y	N	N	N	Y	N	N	Y	N	Product site	https://www.hackensackmeridianhealth.org/en/covid19/Digital-Proof-of-COVID-19-Vaccination	2022	2022-12-06
17	Immune مناعة	Y	Y	N		N	Y	Y	Y	Y	Y	N	Y	Y	N	N	N	N	N	Government site	https://vaxcert.moh.gov.kw/tc/vaccine_instructions_en.html	N/A	2022-12-06
18	LA Wallet	smart health card																					2022-12-06
19	LeaveHomeSafe	Y	Y	Y		N	Y	Y	N	Y	Y	N	N	Y	N	N	N	Y	N	Product site	https://www.leavehomesafe.gov.hk/en/vaccine-pass and https://www.leavehomesafe.gov.hk/_files/docs/Steps%20to%20Store%20and%20Display%20COVID-19%20Vaccination%20Record%20(EN).pdf	2022	2022-12-06
20	mojelKP - log in to health	eu certificate
21	myColorado	Y	Y	N		N	Y	Y	Y	Y	Y	N	N	N	Y	N	N	Y	N	Product site	https://mycolorado.state.co.us/myvaccine-record	2022	2022-12-07
22	MySejahtera	Y	Y	Y		Y	Y	Y	Y	Y	Y	Y	N	Y	Y	N	N	Y	N	Product site	https://mysejahtera.moh.gov.my/en/about-mysejahtera/privacy-policy AND https://www.healthcareitnews.com/news/asia/malaysia-launches-vaccine-certificate-verification-app and https://www.youtube.com/watch?v=vw17jN5uPWA	2021	2022-12-07
23	NHS App	Y	Y	Y		Y	Y	Y	Y	Y	y	Y	Y	Y	Y	N	N	Y	N	Documentation	https://assets.publishing.service.gov.uk/government/uploads/system/uploads/attachment_data/file/1007474/covid-19-vaccination-status-what-your-confirmation-letter-tells-you-easy-read.pdf	N/A	2022-12-07
24	NLVaxPass	Y	Y	Y		N	Y	Y	Y	Y	Y	Y	Y	Y	N	N	N	Y	N	Documentation	https://www.gov.nl.ca/covid-19/files/QRG-NLVaxPass-Final.pdf	2022	2022-12-07
25	NYC COVID SAFE	Y	Y	N		N	Y	Y	Y	Y	Y	N	N	N	Y	N	N	Y	N	Product store site	https://apps.apple.com/us/app/nyc-covid-safe/id1565213506	2021	2022-12-07
26	PAK Covid-19 Vaccination Pass	not free
27	PC-Covid Viet Nam	Y	Y	N		N	Y	Y	N	Y	Y	Y	N	Y	N	N	N	Y	N	News outlet	https://vietnamnews.vn/society/1173816/viet-nam-begins-to-issue-covid-vaccine-passports-from-today.html	2022-04-15	2022-12-07
28	PeduliLindungi	Y	Y	Y		N	Y	Y	Y	Y	Y	N	N	Y	N	N	N	N	N	News outlet	http://johorejo.desa.id/kabardetail/7102/cara-cetak-dan-download-sertifikat-vaksin-internasional-di-pedulilindungi.html	2022-04-01	2022-12-07
29	Pocket Vax	Y	Y	N		N				Y	Y	N	N	N	N	N	N	N	Y	Developer site	https://www.austinapphouse.com/pocket-vax/		2022-12-07
30	Service NSW	Y	Y	Y		N	Y	Y	N	Y	Y	Y	N	N	N	N	N	Y	N	Government site	https://www.servicesaustralia.gov.au/proof-covid-19-vaccinations-for-businesses?context=60075		2022-12-07
31	Siqi	no information
32	Tarassud+	Y	N	Y		N	Y	Y	Y	Y	Y	N	Y	N	Y	N	N	N	N	Product store site	https://apps.apple.com/us/app/tarassud/id1502105746		2022-12-07
33	Tawakkalna (Covid-19 KSA)	cannot access product site																			https://www.youtube.com/watch?v=wl3R-G9uYyg		2022-12-07
34	Tecka	Y	Y	N		Y	Y	Y	N	Y	Y	Y	Y	Y	N	N	N	N	N	Government site	https://ockodoc.mzcr.cz/en/support/tecka/how-to-use-the-application-tecka/		2022-12-07
35	TousAntiCovid	Y	Y	N		N	Y	Y	N	Y	Y	Y	Y	N	N	N	N	N	N	Consulate general, news outlet	https://hongkong.consulfrance.org/Recognition-of-French-vaccination-certificates-in-Hong-Kong and https://runwaygirlnetwork.com/2021/06/frances-vaccine-passport-covid-app/		2022-12-07
36	TraceTogether	Y	Y	Y		Y	Y	Y	Y	Y	Y	Y	N	Y	Y	N	N	N	N	Government airline	https://www.singaporeair.com/saar5/pdf/travel-info/vaccinated-travel-lane/Sample_VacCert_16122021_sm.pdf		2022-12-07
37	United Airlines
38	Conecte SUS	Y	Y	Y		N	Y	N	Y	Y	Y	Y	N	N	Y	N	N	N	N	Government site	https://www.gov.br/saude/pt-br/assuntos/conecte-sus/conecte-sus-english		2022-12-07
39	EHTERAZ	Y	N	N		Y	N	N	N	Y	Y	N	N	N	N	N	N	Y	N	Product site	https://play.google.com/store/apps/details?id=com.moi.covid19&hl=en_US&gl=US		2022-12-07
40	Healthy Together	no information
41	Immuny	not in english
42	My Bindle	Y	Y	N		N	Y	Y	Y	Y	Y	N	N	N	Y	N	N	Y	N	Product site	https://www.bindlesystems.com/meet-the-app		2022-12-07
43	NavusHealth	not enough information
44	VaxiCode	Y	Y	N		N	Y	Y	Y	Y	Y	N	N	N	Y	N	N	N	N	Product store site	https://play.google.com/store/apps/details?id=ca.quebec.vaccandroid&hl=en_US&gl=US		2022-12-07
45	Coronavirus UY	no information
46	หมอพร้อม	Y	Y	N		N	Y	Y	Y		Y	N	Y	N	Y	N	N	N	N	Product store site	https://play.google.com/store/apps/details?id=com.mor.promplus&hl=th&gl=US		2022-12-07
47	CommonPass	Y	Y	N		N	Y	Y	Y	Y	Y	N	N	N	Y	N	N	Y	N	Product site	https://www.commonhealth.org/smart-health-cards		2022-12-07
48	Life Fits Home	Y	Y	Y		Y	Y	Y	N	Y	Y	N	N	N	N	N	N	N	N	News outlet	https://www.dbaturkey.org/news/		2022-12-07
49	Surokkha	Y	Y	Y		N	Y	Y	N	Y	Y	N	Y	N	Y	N	N	N	N	Government site	http://www.bard.gov.bd/sites/default/files/files/bard.portal.gov.bd/notices/fd839669_076f_48f2_aa39_d7cba3a21eda/2022-06-23-08-46-f22d8ff2e4ee0cd4b161492fbd99197e.pdf		2022-12-07

## Sheet: Compliancy
Requirement status for Proof of Vaccination	REQUIRED	REQUIRED	OPTIONAL	NOT NEEDED	REQUIRED	REQUIRED	REQUIRED	REQUIRED	REQUIRED	REQUIRED	OPTIONAL	OPTIONAL	REQUIRED	OPTIONAL	CONDITIONAL	OPTIONAL	OPTIONAL	NOT NEEDED
APP NAME	NAME	DATE OF BIRTH	UNIQUE IDENTIFIER	SEX	VACCINE OR PROPHYLAXIS	VACCINE BRAND	VACCINE MANUFACTURER OR VACCINE MARKET AUTHORIZATION HOLDER	VACCINE BATCH NUMBER	DATE OF VACCINATION	DOSE NUMBER	VACCINATION VALID FROM	TOTAL DOSES	COUNTRY OF VACCINATION	ADMINISTERING CENTER	SIGNATURE OF HEALTH WORKER	HEALTH WORKER IDENTIFIER	DISEASE OR AGENT TARGETED	DUE DATE OF NEXT DOSE	Source	Second source	Link	Date Accessed	Data source	Count Required Data*	Percentage	Count All Data
401Health	Y	Y	N	N	Y	Y	N	Y	Y	Y	N	N	N	Y	N	N	N	N	Product site	Documentation	https://covid.ri.gov/covid-19-prevention/401health-app AND https://smarthealth.cards/en/faq.html#How-can-I-get-a-COVID-19-SMART-Health-Card	2022-12-06	Issued by vaccine provider through SMARTHealth	7	0.777778	8
AarogyaSetu	Y	N	Y	Y	N	Y	N	N	Y	Y	N	Y	N	N	N	N	N	Y	Documentation		https://www.aarogyasetu.gov.in/wp-content/uploads/2021/06/mygov-999999999903278292.pdf	2022-12-02	Self assessment with verification (Cowin portal)	4	0.444444	8
ALHOSN	Y	N	Y	N	N	Y	N	N	Y	Y	N	Y	N	Y	N	N	N	N	Product site		https://alhosnapp.ae/en/using-alhosn/	2022-12-02	Issued by vaccine provider	4	0.444444	7
ArriveCAN	Y	Y	Y	N	Y	Y	Y	N	Y	Y	N	N	Y	N	N	N	N	N	Product site		https://arrivein.com/immigration/how-to-use-arrivecan-to-enter-canada/	2022-12-06	Self assessment with documentation proof	8	0.888889	9
CANImmunize	Y	Y	Y	N	Y	Y	N	Y	Y	Y	N	Y	N	Y	Y	N	Y	N	Product site		https://www.canimmunize.ca/en/how-to-enter-your-vaccinations-with-canimmunize	2022-12-06	Self assessment with documentation proof	7	0.777778	12
CLEAR - Fast, Touchless Access	Y	N	Y	N	Y	Y	N	N	Y	Y	N	N	N	Y	N	N	N	N	Product site	Documentation	https://www.clearme.com/faq-categories/digital-vaccine-card	2023-02-22	Issued by partnering vaccine provider, uploading CDC card, or connecting to a SMARTHealth, with self-input verification	5	0.555556	7
CommonHealth	Y	Y	N	N	Y	Y	N	Y	Y	Y	N	N	N	Y	N	N	N	N	Product site		https://www.commonhealth.org/smart-health-cards	2023-02-22	Issued by vaccine provider through SMARTHealth	7	0.777778	8
Conecte SUS	Y	Y	Y	Y	N	Y	N	Y	Y	Y	Y	N	N	Y	N	N	N	N	Government site		https://www.gov.br/saude/pt-br/assuntos/conecte-sus/conecte-sus-english	2022-12-07	Issued by vaccine provider	6	0.666667	10
Coronapas	Y	Y	Y	N	Y	Y	Y	N	Y	Y	N	Y	Y	Y	N	N	Y	N	Product site	Documentation	https://en.coronasmitte.dk/general-information/corona-passport AND https://eur-lex.europa.eu/legal-content/EN/TXT/?uri=CELEX%3A32021R0953	2023-02-22	Issued by vaccine provider following EU Digital COVID Certificate standard	8	0.888889	12
Coronavirus UY	Y	Y	Y	N	Y	Y	Y	N	Y	Y	N	Y	Y	Y	N	N	Y	N	Government site	Documentation	https://www.gub.uy/ministerio-salud-publica/comunicacion/publicaciones/preguntas-frecuentes-vacunacion-covid-19/preguntas-frecuentes-16 AND https://eur-lex.europa.eu/legal-content/EN/TXT/?uri=CELEX%3A32021R0953	2023-02-23	Issued by vaccine provider following EU Digital COVID Certificate standard	8	0.888889	12
COVID Certificate	Y	Y	Y	N	Y	Y	Y	N	Y	Y	N	Y	Y	Y	Y	N	Y	N	Product site		https://www.bag.admin.ch/bag/en/home/krankheit AND https://www.bag.admin.ch/bag/en/home/krankheiten/ausbrueche-epidemien-pandemien/aktuelle-ausbrueche-epidemien/novel-cov/covid-zertifikat/covid-zertifikat-grundlagen.html#-74226397	2022-12-06	Issued by vaccine provider	8	0.888889	13
COVIDCert NI	Y	Y	Y	N	Y	Y	Y	Y	Y	Y	N	Y	N	Y	N	N	Y	N	Product site		https://covid-19.hscni.net/privacy-notice-covid-certification-service-and-your-data/	2023-02-22	Issued by vaccine provider	8	0.888889	12
DHA - هيئة الصحة بدبي	Y	N	Y	N	N	Y	N	N	Y	Y	N	Y	N	Y	N	N	N	N	Product site		https://alhosnapp.ae/en/using-alhosn/	2022-12-06	Issued by vaccine provider following ALHOSN	4	0.444444	7
e-Tabib	Y	Y	Y	N	N	N	N	N	N	N	N	N	N	N	N	N	N	N	Privacy policy document		https://a2z.az/terms/305.html	2023-02-02	Issued by vaccine provider	2	0.222222	3
EarthMed GO	Y	Y	N	N	Y	Y	Y	N	Y	Y	N	N	N	N	N	N	N	N	Product site	Documentation	https://bkkservicehub.escap.un.org/documents/COVIDVaxGuide/download and https://apps.apple.com/us/app/earthmed-go/id1593801097	2022-12-06	Self assessment with documentation proof	7	0.777778	7
Egypt Health Passport اطمئن	Y	Y	Y	Y	N	N	N	N	N	N	N	N	N	N	N	N	N	N	Privacy policy document		https://healthcode.mohp.gov.eg/Privacy/	2023-02-03	Issued by vaccine provider	2	0.222222	4
EHTERAZ	N	N	N	N	Y	Y	N	N	Y	Y	N	N	N	N	N	N	N	N	Documentation		https://covid19.moph.gov.qa/EN/Documents/PDFs/Ehteraz-Guide-en.pdf	2022-12-07	Issued by vaccine provider	4	0.444444	4
GHA COVID Pass Gibraltar	Y	Y	Y	N	Y	Y	N	Y	Y	Y	N	Y	Y	Y	N	N	Y	N	Product store site	Privacy policy document	https://play.google.com/store/apps/details?id=com.gha.gibraltarvaccineapp&hl=en_US&gl=US and https://www.gibraltar.gov.gi/mygha-privacy-policy	2022-12-06	Issued by vaccine provider	8	0.888889	12
Healthy Together	Y	Y	Y	N	N	Y	Y	Y	Y	Y	N	N	N	Y	N	N	Y	N	Product site		https://www.healthytogether.co/enterprise/event-health-pass	2023-02-23	Digital version of CDC card	7	0.777778	10
HMH Well	Y	Y	Y	N	N	Y	Y	Y	Y	Y	N	N	N	Y	N	N	Y	N	Product site		https://www.hackensackmeridianhealth.org/en/covid19/Digital-Proof-of-COVID-19-Vaccination AND https://www.clearme.com/faq-categories/digital-vaccine-card	2022-12-06	Issued by vaccine provider, upload CDC card, or connecting to CLEAR	7	0.777778	10
Immune مناعة	Y	Y	Y	N	N	Y	N	Y	Y	Y	N	Y	Y	N	N	N	N	N	Government site		https://vaxcert.moh.gov.kw/tc/vaccine_instructions_en.html	2022-12-06	Self assessment with documentation proof	7	0.777778	9
Immuny	Y	Y	Y	N	Y	Y	Y	N	Y	Y	N	Y	Y	Y	N	N	Y	N	Product store site	Documentation	https://www-immuny-net.translate.goog/?_x_tr_sl=auto&_x_tr_tl=en&_x_tr_hl=en&_x_tr_pto=wapp AND https://eur-lex.europa.eu/legal-content/EN/TXT/?uri=CELEX%3A32021R0953	2023-02-23	Issued by vaccine provider following EU Digital COVID Certificate standard	8	0.888889	12
LA Wallet	Y	Y	N	N	Y	Y	N	Y	Y	Y	N	N	N	Y	N	N	N	N	Product site	Documentation	https://lawallet.com/covid-19/ AND https://smarthealth.cards/en/faq.html#How-can-I-get-a-COVID-19-SMART-Health-Card	2022-12-06	Issued by vaccine provider through SMARTHealth	7	0.777778	8
LeaveHomeSafe	Y	Y	Y	Y	Y	Y	N	N	Y	Y	N	N	Y	N	N	N	Y	N	Product site		https://www.leavehomesafe.gov.hk/en/vaccine-pass and https://www.leavehomesafe.gov.hk/_files/docs/Steps%20to%20Store%20and%20Display%20COVID-19%20Vaccination%20Record%20(EN).pdf	2022-12-06	Issued by vaccine provider (scan QR code)	7	0.777778	10
Life Fits Home	Y	Y	Y	N	Y	Y	Y	N	Y	Y	N	Y	Y	Y	N	N	Y	N	Product store site	Government site	https://play.google.com/store/apps/details?id=tr.gov.saglik.hayatevesigar&hl=en_US&gl=US and https://healthpass.saglik.gov.tr/sss-eng.html	2022-12-07	Issued by vaccine provider following EU Digital COVID Certificate standard, through HealthPass app	8	0.888889	12
mojelKP - log in to health	Y	Y	Y	N	Y	Y	Y	N	Y	Y	N	Y	Y	Y	N	N	Y	N	Product store site	Documentation	https://play.google.com/store/apps/details?id=pl.gov.cez.mojeikp AND https://eur-lex.europa.eu/legal-content/EN/TXT/?uri=CELEX%3A32021R0953	2023-02-22	Issued by vaccine provider following EU Digital COVID Certificate standard	8	0.888889	12
My Bindle	Y	Y	Y	N	N	Y	Y	Y	Y	Y	N	N	N	Y	N	N	Y	N	Product site		https://www.bindlesystems.com/meet-the-app	2022-12-07	Digital version of CDC card	7	0.777778	10
myColorado	Y	Y	Y	N	N	Y	Y	Y	Y	Y	N	N	N	Y	N	N	Y	N	Product site		https://mycolorado.state.co.us/myvaccine-record	2022-12-07	Issued by vaccine provider through SMARTHealth, Digital version of CDC card	7	0.777778	10
MySejahtera	Y	Y	Y	Y	Y	Y	N	Y	Y	Y	N	N	N	Y	N	N	Y	N	Product store site	Product site	https://play.google.com/store/apps/details?id=my.gov.onegovappstore.mysejahtera&hl=en_US&gl=US AND https://mysejahtera.moh.gov.my/en/about-mysejahtera/privacy-policy	2022-12-07	Issued by vaccine provider	7	0.777778	11
NavusHealth	Y	Y	N	N	N	Y	N	N	Y	N	N	N	N	N	N	N	N	N	Product site		https://www.navushealth.com/navpass-navus-health/	2023-02-23	Self assessment	4	0.444444	4
NHS App	Y	Y	Y	N	Y	Y	Y	Y	Y	y	N	Y	Y	Y	N	N	Y	N	Documentation		https://assets.publishing.service.gov.uk/government/uploads/system/uploads/attachment_data/file/1007474/covid-19-vaccination-status-what-your-confirmation-letter-tells-you-easy-read.pdf	2022-12-07	Issued by vaccine provider	9	1	13
NLVaxPass	Y	Y	Y	N	N	Y	Y	Y	Y	Y	N	Y	Y	N	N	N	Y	N	Documentation		https://www.gov.nl.ca/covid-19/files/QRG-NLVaxPass-Final.pdf	2022-12-07	Issued by vaccine provider	8	0.888889	11
NYC COVID SAFE	Y	Y	Y	N	N	Y	Y	Y	Y	Y	N	N	N	Y	N	N	Y	N	Product store site		https://play.google.com/store/apps/details?id=gov.nyc.doitt.covidsafe&hl=en_US&gl=US	2022-12-07	Digital version of CDC card	7	0.777778	10
NYS Wallet	Y	Y	N	N	Y	Y	N	Y	Y	Y	N	N	N	Y	N	N	N	N	Documentation		https://covid19vaccine.health.ny.gov/system/files/documents/2022/10/excelsior_pass_wallet_app_android_english_guide.pdf	2022-12-02	Issued by vaccine provider	7	0.777778	8
PAK Covid-19 Vaccination Pass	Y	Y	N	N	N	N	N	N	N	N	N	N	N	N	N	N	N	N	Privacy policy document		https://nims.nadra.gov.pk/nims/privacyPolicy	2023-02-04	Issued by vaccine provider	2	0.222222	2
PC-Covid Viet Nam	Y	Y	N	N	Y	Y	Y	N	Y	Y	N	Y	Y	Y	N	N	Y	N	Product site	Documentation	https://pccovid.gov.vn/huong-dan-su-dung AND https://eur-lex.europa.eu/legal-content/EN/TXT/?uri=CELEX%3A32021R0953	2023-02-22	Issued by vaccine provider following EU Digital COVID Certificate standard	8	0.888889	11
PeduliLindungi	Y	Y	Y	N	N	Y	Y	Y	Y	Y	N	N	Y	N	N	N	Y	N	Government site		https://sehatnegeriku-kemkes-go-id.translate.goog/baca/rilis-media/20220128/4639226/kemenkes-terbitkan-sertifikat-vaksin-internasional-sesuai-standar-who/?_x_tr_sl=auto&_x_tr_tl=en&_x_tr_hl=en&_x_tr_pto=wapp	2023-02-22	Issued by vaccine provider	8	0.888889	10
Pocket Vax	Y	Y	N	N	N	N	N	N	Y	Y	N	N	N	N	N	N	N	Y	Product site		https://www.austinapphouse.com/pocket-vax/	2022-12-07	Self assessment	4	0.444444	5
Service NSW	Y	Y	Y	N	N	Y	Y	N	Y	Y	Y	N	N	N	N	N	Y	N	Government site		https://www.servicesaustralia.gov.au/proof-covid-19-vaccinations-for-businesses?context=60075	2022-12-07	Issued by vaccine provider	6	0.666667	9
Surokkha	Y	Y	Y	Y	N	Y	Y	N	Y	Y	N	N	N	Y	N	Y	Y	N	Government site		http://www.bard.gov.bd/sites/default/files/files/bard.portal.gov.bd/notices/fd839669_076f_48f2_aa39_d7cba3a21eda/2022-06-23-08-46-f22d8ff2e4ee0cd4b161492fbd99197e.pdf	2022-12-07	Issued by vaccine provider	6	0.666667	11
Tarassud+	Y	N	Y	N	N	Y	N	N	Y	Y	N	N	N	Y	N	N	N	N	Product store site		https://play.google.com/store/apps/details?id=om.gov.moh.tarassudapplication&hl=en_US&gl=US	2022-12-07	Issued by vaccine provider	4	0.444444	6
Tawakkalna (Covid-19 KSA)	Y	N	Y	N	N	Y	N	N	Y	N	N	N	N	N	N	N	N	N	Product site		https://ta.sdaia.gov.sa/en/index	2023-02-23	Issued by vaccine provider	3	0.333333	4
Tecka	Y	Y	N	N	Y	Y	Y	N	Y	Y	Y	Y	Y	N	N	N	N	N	Government site		https://ockodoc.mzcr.cz/en/support/tecka/how-to-use-the-application-tecka/	2022-12-07	Issued by vaccine provider	8	0.888889	10
TousAntiCovid	Y	Y	Y	N	Y	Y	Y	N	Y	Y	N	Y	Y	Y	N	N	Y	N	Government site		https://bonjour.tousanticovid.gouv.fr/en/why-tousanticovid AND https://eur-lex.europa.eu/legal-content/EN/TXT/?uri=CELEX%3A32021R0953	2022-12-07	Issued by vaccine provider following EU Digital COVID Certificate standard	8	0.888889	12
TraceTogether	Y	Y	Y	N	Y	Y	Y	Y	Y	Y	Y	N	Y	Y	N	Y	N	N	Government site		https://www.singaporeair.com/saar5/pdf/travel-info/vaccinated-travel-lane/Sample_VacCert_16122021_sm.pdf	2022-12-07	Issued by vaccine provider or through HealthHub App	9	1	13
United Airlines	Y	Y	Y	Y	N	N	N	N	N	N	N	N	N	N	N	N	N	N	Privacy policy document		https://www.united.com/ual/en/us/fly/privacy.html	2023-02-06	Self assessment with documentation proof	2	0.222222	4
VaxiCode	Y	Y	N	N	N	Y	Y	N	Y	Y	N	N	N	Y	N	N	N	N	Product store site		https://play.google.com/store/apps/details?id=ca.quebec.vaccandroid&hl=en_US&gl=US	2022-12-07	Issued by vaccine provider (scan QR code)	6	0.666667	7
หมอพร้อม	Y	Y	Y	N	N	Y	Y	Y	Y	Y	Y	Y	N	Y	N	N	Y	N	Product store site		https://play.google.com/store/apps/details?id=com.mor.promplus	2022-12-07	Issued by vaccine provider	7	0.777778	12
Average																								6.3125	0.701389	8.97917
SD																								1.991	0.221223	2.99993
																							*: Darker green cell color illustrates higher review/rating, darker red illustrates lower review/rating.
																							Click on column header to toggle view list ascending/descending

## Sheet: Data elements
Data element	Count	Percentage
NAME	47	0.979167
DATE OF VACCINATION	44	0.916667
VACCINE BRAND	43	0.895833
DOSE NUMBER	42	0.875
DATE OF BIRTH	41	0.854167
UNIQUE IDENTIFIER	36	0.75
ADMINISTERING CENTER	31	0.645833
VACCINE MANUFACTURER OR VACCINE MARKET AUTHORIZATION HOLDER	25	0.520833
VACCINE OR PROPHYLAXIS	24	0.5
DISEASE OR AGENT TARGETED	24	0.5
VACCINE BATCH NUMBER	20	0.416667
TOTAL DOSES	19	0.395833
COUNTRY OF VACCINATION	17	0.354167
SEX	7	0.145833
VACCINATION VALID FROM	5	0.104167
SIGNATURE OF HEALTH WORKER	2	0.0416667
HEALTH WORKER IDENTIFIER	2	0.0416667
DUE DATE OF NEXT DOSE	2	0.0416667
Items in green are required data elements

## Sheet: Compliance - Sav
	Requirement status for Continuity of Care	REQUIRED (4)	REQUIRED (4)	OPTIONAL (3)	OPTIONAL (3)	REQUIRED (4)	REQUIRED (4)	REQUIRED (4)	REQUIRED (4)	REQUIRED (4)	REQUIRED (4)	OPTIONAL (3)	OPTIONAL (3)	REQUIRED (4)	REQUIRED (4)	OPTIONAL (3)	OPTIONAL (3)	OPTIONAL (3)	OPTIONAL (3)	36
	Requirement status for Proof of Vaccination	REQUIRED (4)	REQUIRED (4)	OPTIONAL (3)	NOT NEEDED (1)	REQUIRED (4)	REQUIRED (4)	REQUIRED (4)	REQUIRED (4)	REQUIRED (4)	REQUIRED (4)	OPTIONAL (3)	OPTIONAL (3)	REQUIRED (4)	OPTIONAL (3)	CONDITIONAL (2)	OPTIONAL (3)	OPTIONAL (3)	NOT NEEDED (1)	58
#	Data element	NAME	DATE OF BIRTH	UNIQUE IDENTIFIER	SEX	VACCINE OR PROPHYLAXIS	VACCINE BRAND	VACCINE MANUFACTURER OR VACCINE MARKET AUTHORIZATION HOLDER	VACCINE BATCH NUMBER	DATE OF VACCINATION	DOSE NUMBER	VACCINATION VALID FORM	TOTAL DOSES	COUNTRY OF VACCINATION	ADMINISTERING CENTER	SIGNATURE OF HEALTH WORKER	HEALTH WORKER IDENTIFIER	DISEASE OR AGENT TARGETED	DUE DATE OF NEXT DOSE	Source	Link	Date Accessed	WHO Score (required)	WHO Score Percentages (required)	WHO Score (all)	WHO Score Percentages (all)
1	401Health	Y	Y	N	N	N	N	N	N	N	N	N	N	N	N	N	N	N	N	Privacy Policy	https://covid.ri.gov/covid-19-prevention/crush-covid-ri-app/privacy-policy	Jan. 25 2023	8	0.222222	8	0.137931
2	AarogyaSetu	Y	Y	Y	Y	N	N	N	N	N	N	N	N	N	N	N	N	N	N	Privacy Policy	https://www.aarogyasetu.gov.in/privacy-policy/	Jan. 25 2023	8	0.222222	12	0.206897
3	ALHOSN	N	N	Y	N	N	N	N	N	N	N	N	N	N	N	N	N	N	N	Privacy Policy	https://alhosnapp.ae/en/privacy-policy/	Jan. 25 2023	0	0	3	0.0517241
4	ArriveCAN	N	N	N	N	N	N	N	N	N	N	N	N	N	N	N	N	N	N	Privacy Policy	https://www.canada.ca/en/border-services-agency/services/arrivecan/canarrive-privacy-notice.html	Jan. 25 2023	0	0	0	0
5	CANImmunize	Y	Y	N	N	N	N	N	N	N	N	N	N	N	N	N	N	N	N	Privacy Policy	https://www.canimmunize.ca/en/privacy-policy	Jan. 25 2023	8	0.222222	8	0.137931
6	CLEAR - Fast, Touchless Access	Y	Y	Y	Y	N	N	N	N	N	N	N	N	N	N	N	N	N	N	Privacy Policy	https://www.clearme.com/privacy-policy	Jan. 25 2023	8	0.222222	12	0.206897
7	CommonPass																			Product site	https://www.commonhealth.org/smart-health-cards
8	Conecte SUS	Y	Y	N	Y	Y	N	Y	Y	Y	N	N	N	N	Y	N	Y	Y	N	Privacy Policy	https://conectesus-paciente.saude.gov.br/perfil/politica-privacidade	Jan. 25 2023	24	0.666667	34	0.586207
9	Coronapas	Y	Y	Y	N	Y	Y	Y	N	Y	Y	N	N	Y	N	N	N	Y	N	Privacy Policy	https://en.coronasmitte.dk/general-information/corona-passport/privacy-policy-for-people-travelling-with-corona-passport	Jan. 25 2023	32	0.888889	38	0.655172
10	Coronavirus UY	N	N	N	N	N	N	N	N	N	N	N	N	N	N	N	N	N	N	Privacy Policy	https://www.gub.uy/ministerio-salud-publica/comunicacion/publicaciones/politica-privacidad-app-coronavirusuy	Jan. 25 2023	0	0	0	0
11	COVID Certificate	N	N	N	N	N	N	N	N	N	N	N	N	N	N	N	N	N	N	Privacy Policy	https://www.bit.admin.ch/bit/en/home/documentation/covid-certificate-app.html	Jan. 25 2023	0	0	0	0
12	COVIDCert NI	Y	Y	Y	N	N	N	N	N	N	N	N	N	N	Y	N	N	N	N	Privacy Policy	https://covid-19.hscni.net/covid-certification-service-easy-read-privacy-information/	Jan. 25 2023	8	0.222222	14	0.241379
13	DHA - هيئة الصحة بدبي	Y	Y	N	N	N	N	N	N	N	N	N	N	N	N	N	N	N	N	Privacy Policy	https://www.dha.gov.ae/en/privacy-policy	Jan. 26 2023	8	0.222222	8	0.137931
14	e-Tabib	Y	Y	Y	N	N	N	N	N	N	N	N	N	N	N	N	N	N	N	Privacy Policy	https://a2z.az/terms/305.html	Jan. 26 2023	8	0.222222	11	0.189655
15	EarthMed GO	Y	Y	N	N	N	N	N	N	N	N	N	N	N	N	N	N	N	N	Privacy Policy	https://medical.un.org/earthmedgo/AboutUs/privacy	Jan. 26 2023	8	0.222222	8	0.137931
16	Egypt Health Passport اطمئن	Y	Y	Y	Y	N	N	N	N	N	N	N	N	N	N	N	N	N	N	Privacy Policy	https://healthcode.mohp.gov.eg/Privacy/	Jan. 26 2023	8	0.222222	12	0.206897
17	EHTERAZ	N	N	N	N	N	N	N	N	N	N	N	N	N	N	N	N	N	N	Privacy Policy	https://portal.moi.gov.qa/met2/privacyehteraz.html	Jan. 26 2023	0	0	0	0
18	GHA COVID Pass Gibraltar	Y	Y	Y	N	N	N	N	Y	Y	Y	N	N	N	N	N	N	N	N	Privacy Policy	https://www.gibraltar.gov.gi/mygha-privacy-policy	Jan. 26 2023	20	0.555556	23	0.396552
19	Healthy Together	Y	Y	Y	N	N	N	N	N	N	N	N	N	N	N	N	N	N	N	Privacy Policy	https://www.healthytogether.co/legal/privacy-policy	Jan. 26 2023	8	0.222222	11	0.189655
20	HMH Well	N	N	N	N	N	N	N	N	N	N	N	N	N	N	N	N	N	N	Privacy Policy	https://www.hackensackmeridianhealth.org/en/Privacy-Policy	Jan. 26 2023	0	0	0	0
21	Immune مناعة	N	N	N	N	N	N	N	N	N	N	N	N	N	N	N	N	N	N	Privacy Policy	https://vaxcert.moh.gov.kw/tc/terms_conditions.html	Jan. 26 2023	0	0	0	0
22	Immuny	Y	Y	Y	N	Y	N	Y	Y	Y	N	Y	Y	N	Y	N	N	N	N	Privacy Policy	https://www.immuny.net/appdatenschutz/	Jan. 26 2023	24	0.666667	36	0.62069
23	LA Wallet	Y	Y	Y	Y	N	N	N	N	N	N	N	N	N	N	N	N	N	N	Privacy Policy	https://lawallet.com/privacy-policy/	Jan. 26 2023	8	0.222222	12	0.206897
24	LeaveHomeSafe	Y	Y	Y	Y	N	N	N	N	N	N	N	N	N	N	N	N	N	N	Privacy Policy	https://www.leavehomesafe.gov.hk/en/privacy/	Jan. 26 2023	8	0.222222	12	0.206897
25	Life Fits Home																			News Outlet	https://www.dbaturkey.org/news/
26	mojelKP - log in to health	N	N	N	N	N	N	N	N	N	N	N	N	N	N	N	N	N	N	Privacy Policy	https://pacjent.gov.pl/polityka-prywatnosci	Feb. 1 2023	0	0	0	0
27	My Bindle	Y	Y	Y	Y	N	N	N	N	N	N	N	N	N	N	N	N	N	N	Privacy Policy	https://www.bindlesystems.com/privacy-policy	Feb. 1 2023	8	0.222222	12	0.206897
28	myColorado	Y	N	N	N	N	N	N	N	N	N	N	N	N	N	N	N	N	N	Privacy Policy	https://mycolorado.gov/privacy-policy	Feb. 1 2023	4	0.111111	4	0.0689655
29	MySejahtera	Y	Y	Y	Y	N	N	N	N	N	N	N	N	N	N	N	N	N	N	Privacy Policy	https://mysejahtera.malaysia.gov.my/privasi_en/	Feb. 1 2023	8	0.222222	12	0.206897
30	NavusHealth	Y	Y	Y	Y	N	N	N	N	N	N	N	N	N	N	N	N	N	N	Privacy Policy	https://www.navushealth.com/privacy-policy/	Feb. 1 2023	8	0.222222	12	0.206897
31	NHS App	N	N	N	N	N	N	N	N	N	N	N	N	N	N	N	N	N	N	Privacy Policy	https://www.nhs.uk/nhs-app/nhs-app-legal-and-cookies/nhs-app-privacy-policy/privacy-policy/	Feb. 1 2023	0	0	0	0
32	NLVaxPass	Y	Y	N	N	N	N	Y	Y	Y	Y	N	N	N	N	N	N	N	N	Privacy Policy	https://www.gov.nl.ca/covid-19/life-during-covid-19/vaccination-record/privacy-policy/	Feb. 1 2023	24	0.666667	24	0.413793
33	NYC COVID SAFE	N	N	N	N	N	N	N	N	N	N	N	N	N	N	N	N	N	N	Privacy Policy	https://www1.nyc.gov/assets/doitt/downloads/pdf/nyccovidsafe-app-privacy-policy.pdf	Feb. 1 2023	0	0	0	0
34	NYS Wallet	Y	Y	N	N	N	N	N	N	Y	Y	N	N	N	N	N	N	N	N	Privacy Policy	https://nyswallet.ny.gov/privacy	Feb. 1 2023	16	0.444444	16	0.275862
35	PAK Covid-19 Vaccination Pass	Y	Y	N	N	N	N	N	N	N	N	N	N	N	N	N	N	N	N	Privacy Policy	https://nims.nadra.gov.pk/nims/privacyPolicy	Feb. 1 2023	8	0.222222	8	0.137931
36	PC-Covid Viet Nam	Y	N	N	N	N	N	N	N	N	N	N	N	N	N	N	N	N	N	Privacy Policy	https://pccovid.gov.vn/dieu-khoan-su-dung	Feb. 1 2023	4	0.111111	4	0.0689655
37	PeduliLindungi	Y	Y	Y	N	N	N	N	N	N	N	N	N	N	N	N	N	N	N	Privacy Policy	https://www.pedulilindungi.id/kebijakan-privasi-data?lang=en	Feb. 1 2023	8	0.222222	11	0.189655
38	Pocket Vax																			Developer website	https://www.austinapphouse.com/pocket-vax/
39	Service NSW	N	N	N	N	N	N	N	N	N	N	N	N	N	N	N	N	N	N	Privacy Policy	https://www.service.nsw.gov.au/privacy-statement	Feb. 2 2023	0	0	0	0
40	Siqi
41	Surokkha	N	N	N	N	N	N	N	N	N	N	N	N	N	N	N	N	N	N	Privacy Policy	https://surokkha.gov.bd/privacy-policy	Feb. 2 2023	0	0	0	0
42	Tarassud+	N	Y	Y	N	N	N	N	N	N	N	N	N	N	N	N	N	N	N	Privacy Policy	https://covid19.moh.gov.om/#/privacy-policy	Feb. 2 2023	4	0.111111	7	0.12069
43	Tawakkalna (Covid-19 KSA)	N	N	N	N	N	N	N	N	N	N	N	N	N	N	N	N	N	N	Privacy Policy	https://ta.sdaia.gov.sa/en/privacy-en	Feb. 2 2023	0	0	0	0
44	Tecka	Y	Y	N	N	N	N	Y	N	Y	Y	N	N	Y	Y	N	N	N	N	Privacy Policy	https://ockodoc.mzcr.cz/napoveda/tecka/cz/podminky-pouzivani/	Feb. 2 2023	24	0.666667	27	0.465517
45	TousAntiCovid	Y	Y	Y	N	Y	N	Y	N	Y	Y	N	N	Y	N	N	N	Y	N	Privacy Policy	https://bonjour.tousanticovid.gouv.fr/privacy.html	Feb. 2 2023	28	0.777778	34	0.586207
46	TraceTogether	N	N	N	N	N	N	N	N	N	N	N	N	N	N	N	N	N	N	Privacy Policy	https://www.tracetogether.gov.sg/common/privacystatement	Feb. 2 2023	0	0	0	0
47	United Airlines	Y	Y	Y	Y	N	N	N	N	N	N	N	N	N	N	N	N	N	N	Privacy Policy	https://www.united.com/ual/en/us/fly/privacy.html	Feb. 2 2023	8	0.222222	12	0.206897
48	VaxiCode	Y	Y	N	N	Y	N	N	N	Y	N	N	N	N	N	N	N	N	N	Privacy Policy	https://covid19.quebec.ca/vaxicode/confidentialite.html	Feb. 2 2023	16	0.444444	16	0.275862
49	หมอพร้อม	Y	N	Y	Y	N	N	N	N	N	N	N	N	N	N	N	N	N	N	Privacy Policy	https://mohpromt.moph.go.th/EN/termapplication/	Feb. 2 2023	4	0.111111	8	0.137931

## Sheet: Ref-Vaccine Brand-Manufacturer
Vaccine Brand Name	Vaccine Manufacturer	Proper Name	Link
Comirnaty®, Comirnaty®Original/Omicron BA.1, Comirnaty®Original/Omicron BA.4-5, Pfizer-BioNTech COVID-19 Vaccine (previously)	BioNTech Manufacturing GmbH	COVID-19 Vaccine, mRNA	https://extranet.who.int/pqweb/vaccines/vaccinescovid-19-vaccine-eul-issued
Vaxzevria	AstraZeneca AB	COVID-19 Vaccine (ChAdOx1-S [recombinant])	https://extranet.who.int/pqweb/vaccines/vaccinescovid-19-vaccine-eul-issued
Covishield™	Serum Institute of India Pvt. Ltd	COVID-19 Vaccine (ChAdOx1-S [recombinant])	https://extranet.who.int/pqweb/vaccines/vaccinescovid-19-vaccine-eul-issued
N/A	Janssen–Cilag International NV	COVID-19 Vaccine (Ad26.COV2-S [recombinant])	https://extranet.who.int/pqweb/vaccines/vaccinescovid-19-vaccine-eul-issued
Spikevax, Moderna COVID-19 Vaccine (previously)	Moderna Biotech ModernaTX, Inc	COVID-19 Vaccine, mRNACOVID-19 mRNA Vaccine (nucleoside modified)	https://extranet.who.int/pqweb/vaccines/vaccinescovid-19-vaccine-eul-issued
Sinopharm	Beijing Institute of Biological Products Co., Ltd. (BIBP)	Inactivated COVID-19 Vaccine (Vero Cell)	https://apps.who.int/iris/handle/10665/342431
CoronaVac	Sinovac Life Sciences Co., Ltd	COVID-19 Vaccine (Vero Cell), Inactivated	https://extranet.who.int/pqweb/vaccines/vaccinescovid-19-vaccine-eul-issued
Covaxin®	Bharat Biotech International Ltd	Covid-19 vaccine (Whole Virion Inactivated Corona Virus vaccine)	https://extranet.who.int/pqweb/vaccines/vaccinescovid-19-vaccine-eul-issued
Covovax™	Serum Institute of India Pvt. Ltd	COVID-19 vaccine (SARS-CoV-2 rS Protein Nanoparticle [Recombinant])	https://extranet.who.int/pqweb/vaccines/vaccinescovid-19-vaccine-eul-issued
Nuvaxovid™	Novavax CZ a.s.	COVID-19 vaccine (SARS-CoV-2 rS [Recombinant, adjuvanted])	https://extranet.who.int/pqweb/vaccines/vaccinescovid-19-vaccine-eul-issued
Convidecia	CanSino Biologics Inc.	COVID-19 Vaccine (Ad5-nCoV-S [Recombinant])	https://extranet.who.int/pqweb/vaccines/vaccinescovid-19-vaccine-eul-issued
Jcovden, Janssen COVID-19 Vaccine (previously)	Janssen Biotech Inc., a Janssen Pharmaceutical Company of Johnson & Johnson	COVID-19 vaccine (Ad26.COV2.S [recombinant])	https://www.fda.gov/emergency-preparedness-and-response/coronavirus-disease-2019-covid-19/janssen-covid-19-vaccine https://www.ema.europa.eu/en/medicines/human/EPAR/jcovden-previously-covid-19-vaccine-janssen
